# Supplementary material for: Mutations in the iron-sulfur cluster biogenesis protein HSCB cause congenital sideroblastic anemia
Source: JCI journal article supplement (doi:10.1172/jci135479), 2020-07-07
Supplement: sd1 [file 1]

301 Moved Permanently

# Moved Permanently

The document has moved here.
