# Supplementary material for: Mutations in the iron-sulfur cluster biogenesis protein HSCB cause congenital sideroblastic anemia
Source: JCI journal article supplement (doi:10.1172/jci135479), 2020-07-07
Supplement: sd1 [file 1]

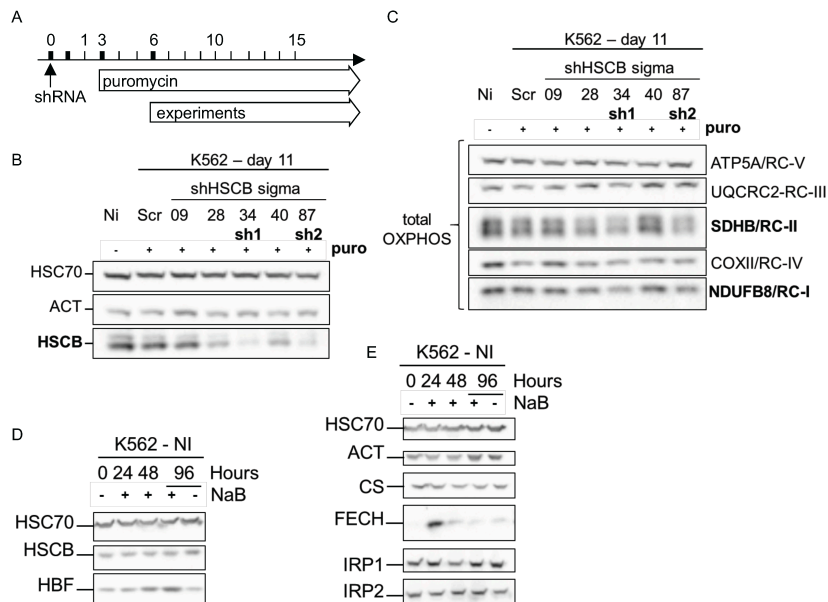

**Supplemental Figure 1. HSCB depletion in K562 decreases Fe-S protein expression and impairs respiratory capacity.** **A.** Diagram of K562 shRNA experimental model (inf: infection with shHSCB or shSCR; 0-15 days). **B.** Representative western blots of HSCB protein expression in K562 cells infected with various shHSCB (09, 28, 34 [sh1], 40, 87 [sh2]). **C.** Cells as in (B) blotted for mitochondrial respiratory proteins. **D.** Time course of fetal hemoglobin (HbF) accumulation in K562 cells 0-96 hrs following induction with sodium butyrate (NaB). **E.** FECH expression peaks at 24 hrs post-NaB induction, while IRP expression is stable. ACO2, aconitase 2; ACT, actin; ATP5A, ATP synthase F1 subunit alpha; CS, citrate synthase; COXII, mitochondrially encoded cytochrome C oxidase II; CS, citrate synthase (mitochondrial protein control); FECH, ferrochelatase; FTH, ferritin heavy chain FTL, ferritin light chain; HbF; hemoglobin F; HSCB, heat shock cognate B; HSC70, heat shock cognate protein 70 kDa; HSPA9, heat shock protein family A (Hsp70) member 9; IRP, iron regulatory protein; NDUFB8, NADH:ubiquinone oxidoreductase subunit B8; NI, non-infected; OXPHOS, oxidative phosphorylation; RC, respiratory complex; SC, scrambled; SDHB succinate dehydrogenase B subunit; sh; short hairpin RNA; UQCRC2, ubiquinol-cytochrome C reductase core protein 2.

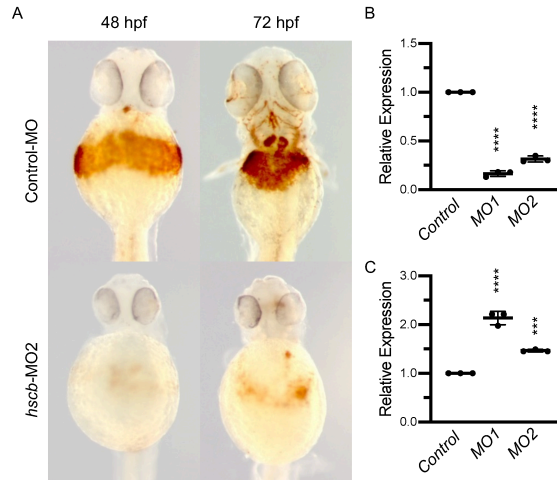

**Supplemental Figure 2. HSCB depletion in zebrafish embryos impairs hemoglobinization.**

**A.** O-dianisidine staining in *hscb* morpholino (*hscb*-MO2)-treated embryos demonstrates reduced hemoglobinization compared to control embryos at 48- and 72-hrs post-fertilization (hpf). Control embryos are the same as in Figure 4B. **B.** *hscb* mRNA is decreased ~85% and 75% in *hscb*-MO1 and -MO2 treated embryos, respectively. **C.** *tfr1* mRNA is upregulated in *hscb*-MO1 and -MO2 treated embryos. Data are  $\pm$  S.D. \*\*\* $P < 0.001$ , \*\*\*\* $P < 0.0001$ .

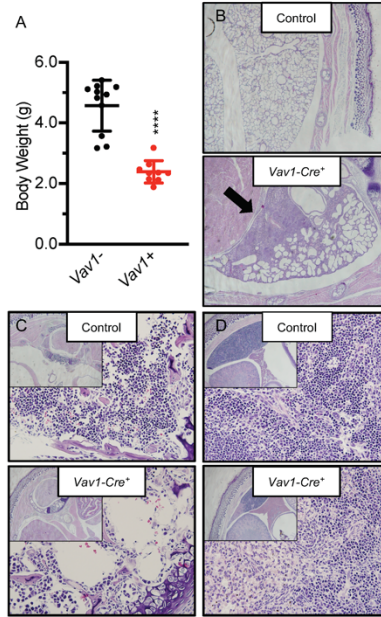

**Supplemental Figure 3. *Hscb* deletion in hematopoietic lineages by *Vav1-Cre* results in pancytopenia, growth failure and lethality. A.** P7 *Hscb-Vav1*<sup>+</sup> animals are runted compared to their littermates. t test \*\*\*\*P<0.0001. **B.** *Hscb-Vav1*<sup>+</sup> animals typically die of pneumonia. Alveoli packed with bacteria, lacking an inflammatory infiltrate are indicated by the arrow. **C.** Vertebral marrow space and **D.** Spleen are depleted of hematopoietic cells in the *Hscb-Vav1*<sup>+</sup> animals.

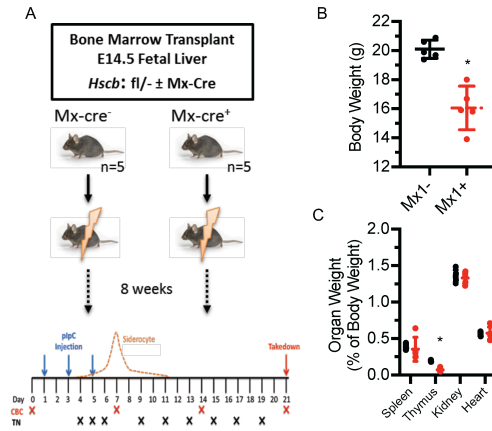

**Supplemental Figure 4. *Hscb* deletion in hematopoietic lineages by *Mx1-Cre* in the adult animal results in pancytopenia and lethality. A.** Schema of *Hscb* *Mx1-Cre* transplant experiments. **B.** Weight loss observed in *Hscb* *Mx1-Cre*<sup>+</sup> stem cell recipients. **C.** Organ weights normalized to body weight showing thymic atrophy in *Hscb* *Mx1-Cre*<sup>+</sup> stem cell recipients. t test \*P<0.05, \*\*\*\*P<0.0001

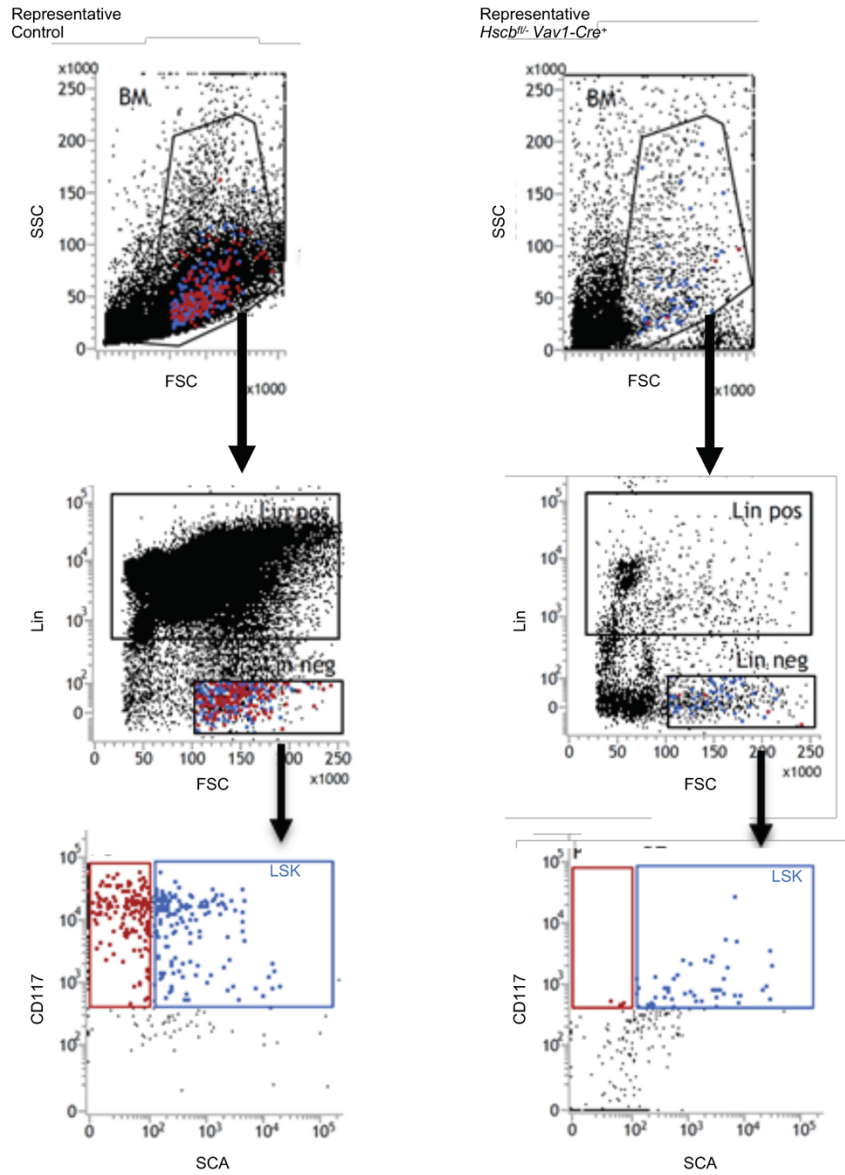

**Supplemental Figure 5. Flow cytometry gating strategy for lineage negative, Sca1<sup>+</sup>, Kit<sup>+</sup> (Lin<sup>-</sup>Sca<sup>+</sup>Kit<sup>+</sup>).**

**Supplemental Table 1. *HSCB* genomic DNA primers**

| <b>Forward primer</b> | <b>Sequence</b>         | <b>Reverse primer</b> | <b>Sequence</b>      |
|-----------------------|-------------------------|-----------------------|----------------------|
| HSCB ex1F             | TGCCTCCTGGGAGTTGTAGT    | HSCB ex1R             | AGATCCGTCCTCCCCTCTC  |
| HSCB ex2F             | CCCCATAAGAGCAAGAACCA    | HSCB ex2R             | AAGGCTACTGCCACCCAGT  |
| HSCB ex3F             | AGCCTGGATGACTCAACGTC    | HSCB ex3R             | TGGCTGTCCTACGCCATAAT |
| HSCB ex4F             | CATTACTCTGCCATAGCTTCTT  | HSCB ex4R             | CCCGGGCCATTATATACTCT |
| HSCB ex5F             | TCCTTTGTTGTGTTCAAACCAG  | HSCB ex5R             | TGGCTATGCTTCAGTGCTTG |
| HSCB ex6F             | ATCGCTGCCCTAGTCATCAG    | HSCB ex6R             | CCCAATTACCAGAAGCCAGA |
| HSCB pro1F            | TTCCAGAGGTCTTTCAAGTGAA  | HSCB pro1R            | GTTTAGCGCCACTCTGCTG  |
| HSCB pro2F            | TTCCCATATGACTCACCGC     | HSCB pro2R            | ATCAGTCCCGCCTTCTCTTC |
| HSCB pro3F            | TATGGACTGGTACGAGCGC     | HSCB pro3R            | CCTTCATCCCTGTCTCTCCC |
| HSCB pro4F            | TGGTAAGGAAATAGGACAGACTC | HSCB pro4R            | AGTGACTGGTGGGGAAGATC |

**Supplemental Table 2. Primary antibodies**

| <b>Name</b> | <b>Protein</b>                                             | <b>Supplier</b> | <b>Reference</b> |
|-------------|------------------------------------------------------------|-----------------|------------------|
| ACO2        | Mitochondrial aconitase                                    | Abcam           | ab129069         |
| ACT         | Actin                                                      | Cell Signaling  | 13E5             |
| ATP5A*      | Mitochondrial membrane ATP synthase (F(1)F(0) ATP synthase | Abcam           | MS601/ab110411   |
| COX2*       | Cyclooxygenase 2                                           | Abcam           | MS601/ab110411   |
| CS          | Citrate synthase                                           | Cell Signaling  | D7V8B            |
| FECH        | Ferrochelatase                                             | Proteintech     | 14466-1-AP       |
| FTH         | Ferritin subunit H                                         | Cell Signaling  | 4393S            |
| FTL         | Ferritin subunit L                                         | Sigma           | HPA041602        |
| HBF         | Hemoglobin fetal                                           | Abcam           | ab137096         |
| HSC70       | Heat shock cognate 71 kDa protein                          | Santa Cruz      | sc-7298          |
| HSCB        | HSC20/heat shock cognate B                                 | Origene         | TA507274         |
| HSPA9       | GRP75, heat shock protein A9                               | Abcam           | ab2799           |
| IMMT        | Inner Membrane Mitochondrial Protein/ Mitofilin            | Abcam           | ab137057         |
| IRP1/ACO1   | Iron regulatory protein 1                                  | Cell Signaling  | 20272            |
| IRP2        | Iron regulatory protein 2                                  | Cell Signaling  | 37135            |
| Lipoate     | Lipoic acid                                                | Abcam           | ab58724          |
| MTCYB       | Mitochondrially Encoded Cytochrome B                       | Abcam           | ab81215          |
| NDUFB8      | NADH:Ubiquinone Oxidoreductase Subunit B8                  | Abcam           | ab110242         |
| SDHA        | Succinate Dehydrogenase Complex Flavoprotein Subunit A     | Abcam           | ab14715          |
| SDHB        | Succinate Dehydrogenase Complex Iron Sulfur Subunit B      | Abcam           | ab175225         |
| tOXPHOS     | Human total OXPHOS                                         | Abcam           | MS601/ab110411   |
| UQCRC2      | Ubiquinol-Cytochrome C Reductase Core Protein 2            | Abcam           | ab14745          |

**Supplemental Table 3. Secondary antibodies**

| <b>Supplier</b> | <b>Name</b>     | <b>Reference</b> |
|-----------------|-----------------|------------------|
| GE Healthcare   | Ecl Anti Mouse  | NA931V           |
| GE Healthcare   | Ecl Anti Rabbit | NA9340V          |
